# Supplementary material for: Investigating the photophysical properties of rhodamines using a spectroscopic single-molecule fluorescence method
Source: Royal Society of Chemistry journal article supplement (doi:10.1039/d4ra06577h), 2024-01-01
Supplement: d4ra06577h1.pdf [file d4ra06577h1.pdf]

*Supplementary Information*

**Investigating the photophysical properties of rhodamines using a spectroscopic single-molecule fluorescence method**

Shangyuan Deng,<sup>‡ab</sup> Deqi Yi,<sup>‡ab</sup> Thitima Rujiralai,<sup>c</sup> Qinghua Ren,<sup>§d</sup> Chuang Tan<sup>§ab</sup> and Jie Ma<sup>§ab</sup>

<sup>a</sup> School of Physics, Sun Yat-sen University, Guangzhou 510275, China. E-mail: tanch26@mail.sysu.edu.cn; majie6@mail.sysu.edu.cn

<sup>b</sup> State Key Laboratory of Optoelectronic Materials and Technologies, Sun Yat-sen University, Guangzhou 510006, China

<sup>c</sup> Division of Physical Science, Faculty of Science, Prince of Songkla University, Songkhla, 90110, Thailand

<sup>d</sup> Department of Chemistry, Shanghai University, Shanghai 200444, China. E-mail: qinghua.ren@shu.edu.cn

<sup>‡</sup> These authors contributed equally to this work.

<sup>§</sup> Regarded as co-corresponding authors.

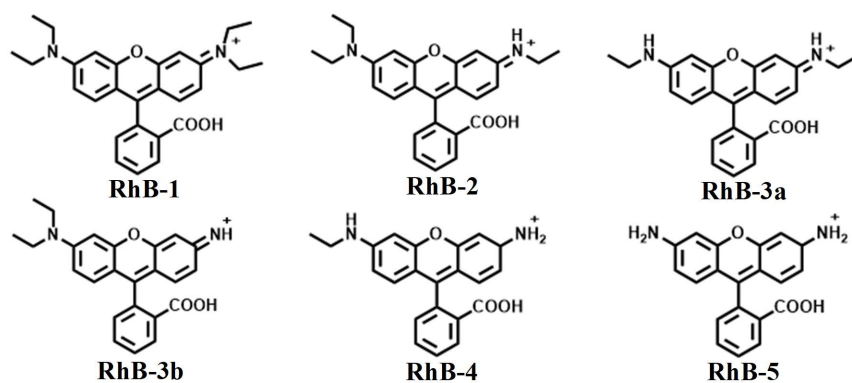

**Fig. S1** The molecular structures of different kinds of rhodamine B in their "open" forms.

**Table S1** The reported peak wavelengths in the absorption spectra and emission spectra of five kinds of rhodamine B in 0.1% TFA – ethanol.<sup>1</sup>

|                      | RhB-1 | RhB-2 | RhB-3a | RhB-3b | RhB-4 | RhB-5 |
|----------------------|-------|-------|--------|--------|-------|-------|
| Absorption peak (nm) | 554   | 540   | 531    | 528    | 519   | 509   |
| Emission peak (nm)   | 578   | 564   | 556    | 554    | 543   | 531   |

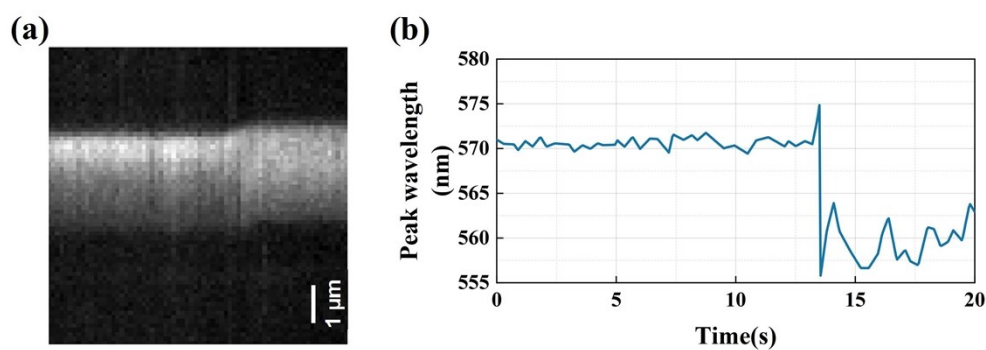

**Fig. S2** The blue shift of the emission peak of a single RhB molecule due to the transition to its dealkylated product. (a) Time profile of the blue shift process. (b) The variation of the peak wavelength with time. The peak wavelength shifts from  $\sim 570$  nm to  $\sim 558$  nm after transition at  $t = 13.5$  s.

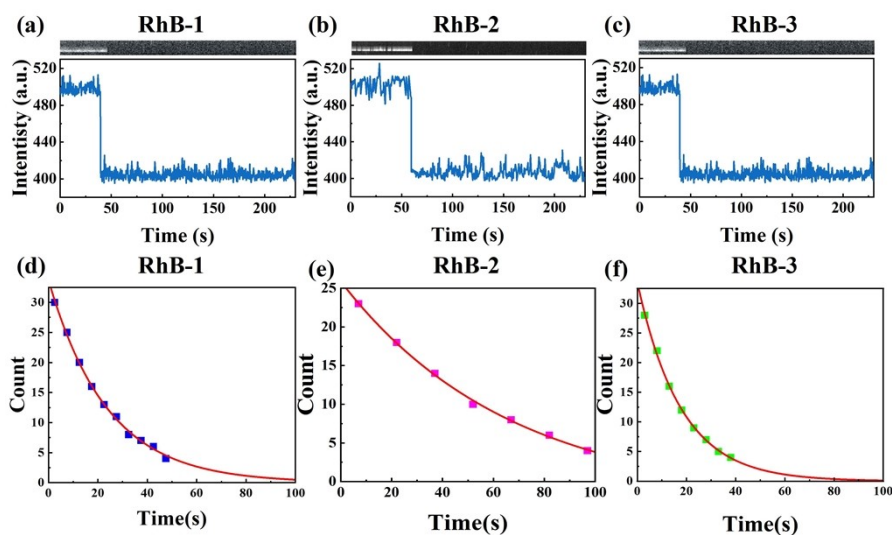

**Fig. S3** Single-molecule fluorescence signals and photobleaching lifetimes of three types of rhodamine B molecules in T50 buffer (pH 4.9). (a)-(c) Typical single-molecule fluorescence trajectories measured for RhB-1, RhB-2, and RhB-3 molecules, respectively. (d)-(f) Photobleaching time distributions of RhB-1, RhB-2, and RhB-3 molecules fitted with single exponential functions to generate characteristic photobleaching lifetimes. The photobleaching lifetime of RhB-1 molecules is  $32.5 \pm 2.1$  s, RhB-2 molecules is  $66.2 \pm 2.5$  s, and RhB-3 molecules is  $23.6 \pm 1.3$  s.

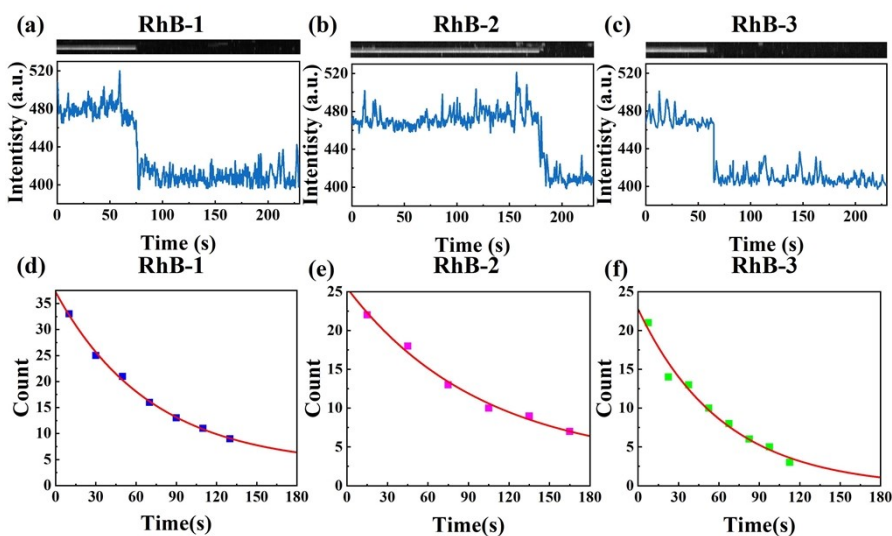

**Fig. S4** Single-molecule fluorescence signals and photobleaching lifetimes of three types of rhodamine B molecules in T50 buffer (pH 8.0 with PCA-PCD OSS). (a)-(c) Typical single-molecule fluorescence trajectories measured for RhB-1, RhB-2, and RhB-3 molecules. (d)-(f) Photobleaching time distributions of RhB-1, RhB-2, and RhB-3 molecules fitted with single exponential functions to generate characteristic photobleaching lifetimes. The photobleaching lifetime of RhB-1 molecules is  $78.1 \pm 3.1$  s, RhB-2 molecules is  $113.3 \pm 4.1$  s, and RhB-3 molecules is  $62.9 \pm 3.3$  s.

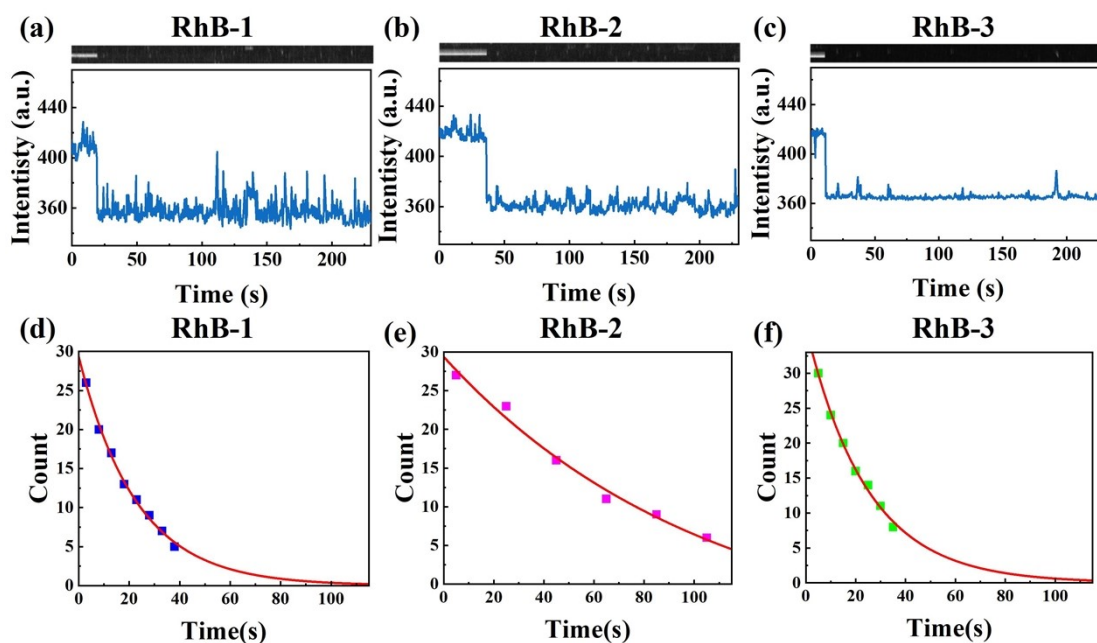

**Fig. S5** Single-molecule fluorescence signals and photobleaching lifetimes of three types of rhodamine B molecules in T50 buffer (pH 10.3). (a)-(c) Typical single-molecule fluorescence trajectories measured for RhB-1, RhB-2, and RhB-3 molecules in T50 buffer. (d)-(f) Photobleaching time distributions of RhB-1, RhB-2, and RhB-3 molecules in T50 buffer, fitted with single exponential functions to generate characteristic photobleaching lifetimes. The photobleaching lifetime of RhB-1 molecules is  $23.8 \pm 1.6$  s, RhB-2 molecules is  $53.3 \pm 1.8$  s, and RhB-3 molecules is  $18.1 \pm 1.5$  s.

**Table S2** The measured populations of RhB-1, RhB-2, and RhB-3 within the same sample under different T50 buffer conditions (pH 4.9, pH 8.0, pH 10.3).

|            |       | T50 (pH 4.9) | T50 (pH 8.0) | T50 (pH 10.3) |
|------------|-------|--------------|--------------|---------------|
|            | RhB-1 | 42%          | 43%          | 44%           |
| Population | RhB-2 | 37%          | 38%          | 36%           |
|            | RhB-3 | 21%          | 19%          | 20%           |

## Computational details

Gaussian 16 program<sup>2</sup> is used for the density functional theory (DFT) calculations<sup>3</sup> in the gas phase geometry optimization where the B3LYP-D3 method<sup>4</sup> is selected using the Gaussian keyword “Empirical Dispersion = GD3” and the C, N, O and H atoms use 6-31G (d,p) basis set.<sup>5</sup> Frequency analysis is performed at the same level to ensure that the optimized geometry is at the minimum point on the potential energy surface without imaginary frequencies. Then the time-dependent DFT (TD-DFT) calculations<sup>6</sup> are performed to calculate the fluorescent emission wavelengths using the M06 functionals<sup>7</sup> combined with the 6-31+G (d, p) basis set in water solvent with a SMD model.<sup>8</sup>

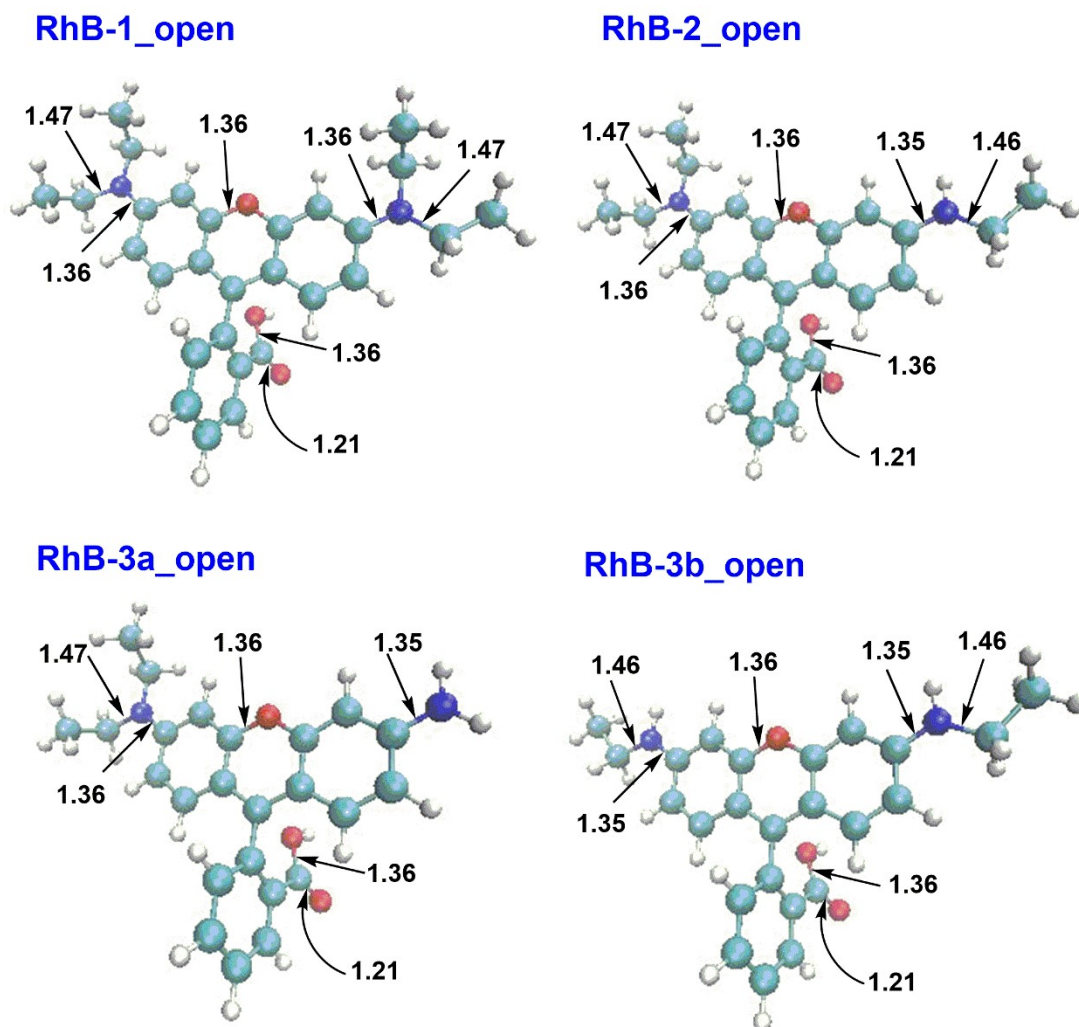

**Fig. S6** Fully optimized structures of the “open”/fluorescent form of rhodamine molecules **RhB-1**, **RhB-2**, **RhB-3a**, and **RhB-3b**. (Color scheme: C, cyan; H, white; O, red; N, blue. Distances are given in Å.)

## Cartesian coordinates (xyz file) of all molecules

64

RhB-1\_open (charge=1 multiplicity=1 E= -1263.519283 Hartree)

|   |             |             |             |
|---|-------------|-------------|-------------|
| C | -0.02231200 | 5.29275000  | -1.35492800 |
| C | 0.39828900  | 4.91798100  | -0.08213000 |
| C | 0.34434200  | 3.57957200  | 0.32921200  |
| C | -0.12252500 | 2.59467200  | -0.56832800 |
| C | -0.54657400 | 2.98621500  | -1.84598800 |
| C | -0.50078000 | 4.32399300  | -2.23754900 |
| H | 0.02051700  | 6.33454900  | -1.65478600 |
| H | 0.77092100  | 5.65266200  | 0.62307000  |
| H | -0.89720900 | 2.22873400  | -2.53997000 |
| H | -0.83203400 | 4.60390500  | -3.23248200 |
| C | -0.12251000 | 1.13637000  | -0.26293600 |
| C | 0.78291400  | 3.30719300  | 1.73253200  |
| O | 1.47516900  | 4.05949400  | 2.38287200  |
| C | 1.08991800  | 0.41877400  | -0.21056600 |
| C | 1.06175300  | -0.98326100 | 0.03773200  |
| C | 2.37966500  | 0.99069200  | -0.39683200 |
| C | 2.19872900  | -1.75921500 | 0.11546000  |
| C | 3.52224400  | 0.24256400  | -0.31715500 |
| H | 2.45381000  | 2.05047400  | -0.61164900 |
| C | 3.48106100  | -1.16959800 | -0.03752200 |
| H | 2.06461000  | -2.81647900 | 0.28965100  |
| H | 4.46845600  | 0.73856600  | -0.47611500 |
| C | -1.33382700 | 0.44229600  | -0.08261400 |
| C | -2.62310500 | 1.04810900  | -0.08765000 |
| C | -1.30636100 | -0.96278300 | 0.15479100  |
| C | -3.76463800 | 0.32084000  | 0.10353000  |
| H | -2.69174600 | 2.11803200  | -0.24575300 |
| C | -2.44471700 | -1.71680300 | 0.34816300  |
| C | -3.72234000 | -1.09972600 | 0.33680800  |
| H | -4.71281200 | 0.83884500  | 0.08498200  |
| H | -2.31670200 | -2.77778200 | 0.50501300  |
| O | -0.12388900 | -1.63507700 | 0.20156400  |
| N | 4.62526000  | -1.89671600 | 0.07138300  |
| N | -4.85901100 | -1.81036700 | 0.55621400  |
| C | 5.92672000  | -1.24622700 | -0.21729800 |
| H | 6.00695700  | -0.35885300 | 0.41904400  |
| H | 5.92468700  | -0.89972200 | -1.25925100 |
| C | 7.16236900  | -2.10863700 | 0.01958800  |
| H | 8.04202400  | -1.50314100 | -0.21524800 |
| H | 7.25140700  | -2.42463800 | 1.06247900  |
| H | 7.19279400  | -2.99164000 | -0.62397600 |

|   |             |             |             |
|---|-------------|-------------|-------------|
| C | -6.19027500 | -1.18504200 | 0.45943400  |
| H | -6.88363100 | -1.83137400 | 1.00154100  |
| H | -6.17966400 | -0.23609300 | 1.00351500  |
| C | -6.67808500 | -0.98495600 | -0.97896100 |
| H | -6.77940400 | -1.94190500 | -1.49654400 |
| H | -7.65620500 | -0.49496900 | -0.97528100 |
| H | -5.98590900 | -0.36260500 | -1.55270200 |
| C | -4.81443000 | -3.26644200 | 0.76964300  |
| H | -5.73068900 | -3.54080400 | 1.29708700  |
| H | -3.99345000 | -3.49653600 | 1.45545400  |
| C | -4.69064400 | -4.08105700 | -0.52245700 |
| H | -4.62650600 | -5.14708300 | -0.28502100 |
| H | -5.55984200 | -3.92952500 | -1.16698300 |
| H | -3.79760400 | -3.80177900 | -1.08825100 |
| O | 0.30179000  | 2.14288500  | 2.23225500  |
| H | 0.64072700  | 2.07655600  | 3.14135700  |
| C | 4.56221300  | -3.35656600 | 0.23875600  |
| H | 3.78205300  | -3.58886200 | 0.96790800  |
| H | 5.49237300  | -3.68609400 | 0.69749500  |
| C | 4.32783800  | -4.10207000 | -1.07884900 |
| H | 3.39448700  | -3.78603900 | -1.55302800 |
| H | 5.14379000  | -3.91312700 | -1.78244900 |
| H | 4.27587900  | -5.17991800 | -0.89912600 |

58

RhB-2\_open (charge=1 multiplicity=1 E= -1263.519283 Hartree)

|   |             |             |             |
|---|-------------|-------------|-------------|
| C | -1.20146700 | 4.93030200  | 1.25647900  |
| C | -1.51051200 | 4.46385300  | -0.01768600 |
| C | -1.22814500 | 3.14229300  | -0.38975900 |
| C | -0.63852400 | 2.26805300  | 0.54917900  |
| C | -0.32904400 | 2.75124900  | 1.82814900  |
| C | -0.60506400 | 4.07208900  | 2.18072900  |
| H | -1.42236300 | 5.95786300  | 1.52557800  |
| H | -1.97101200 | 5.11221700  | -0.75480500 |
| H | 0.11692900  | 2.07730900  | 2.55290000  |
| H | -0.35904200 | 4.42454600  | 3.17733800  |
| C | -0.37621700 | 0.82505200  | 0.28326100  |
| C | -1.57264100 | 2.77176600  | -1.79702400 |
| O | -2.31611100 | 3.41709800  | -2.50328800 |
| C | -1.43880800 | -0.10265900 | 0.27054100  |
| C | -1.15292800 | -1.48383800 | 0.05657900  |
| C | -2.80790100 | 0.24193600  | 0.45546200  |
| C | -2.13494600 | -2.44984000 | 0.01685700  |
| C | -3.80080300 | -0.70026500 | 0.41689500  |
| H | -3.06264200 | 1.28065800  | 0.63129100  |

|   |             |             |             |
|---|-------------|-------------|-------------|
| C | -3.48826400 | -2.08055800 | 0.19268100  |
| H | -1.85180100 | -3.48350700 | -0.14937600 |
| H | -4.83021100 | -0.39814500 | 0.56062000  |
| C | 0.93903100  | 0.36067800  | 0.10397000  |
| C | 2.09464500  | 1.19389700  | 0.07907400  |
| C | 1.16868300  | -1.03128800 | -0.09957400 |
| C | 3.34847400  | 0.68460300  | -0.11047900 |
| H | 1.96606300  | 2.26131500  | 0.21560700  |
| C | 2.42430400  | -1.56791000 | -0.28862000 |
| C | 3.56655100  | -0.72551900 | -0.30932700 |
| H | 4.18580400  | 1.36745000  | -0.11156600 |
| H | 2.49275300  | -2.63768900 | -0.42080800 |
| O | 0.12879500  | -1.90978900 | -0.11583900 |
| N | -4.45804700 | -3.01893400 | 0.15297700  |
| N | 4.81227200  | -1.22046800 | -0.52402900 |
| C | -5.89190400 | -2.77722500 | 0.31941900  |
| H | -6.23526400 | -2.07593200 | -0.45175500 |
| H | -6.07093600 | -2.30719400 | 1.29482200  |
| C | -6.66399500 | -4.08856000 | 0.21978000  |
| H | -7.73296900 | -3.90269600 | 0.34520000  |
| H | -6.51743800 | -4.55996900 | -0.75738500 |
| H | -6.35098400 | -4.79051400 | 0.99932100  |
| C | 6.00298400  | -0.35186900 | -0.49993800 |
| H | 6.78642200  | -0.87282900 | -1.05435100 |
| H | 5.79123400  | 0.55864200  | -1.06766100 |
| C | 6.49579900  | -0.01489000 | 0.91099100  |
| H | 6.79748500  | -0.91735300 | 1.44824200  |
| H | 7.36149500  | 0.65145400  | 0.85329200  |
| H | 5.71872700  | 0.48331900  | 1.49739700  |
| C | 5.03920700  | -2.66876900 | -0.66670400 |
| H | 5.99612100  | -2.79392300 | -1.17762000 |
| H | 4.28218700  | -3.07925500 | -1.34215800 |
| C | 5.05284600  | -3.42880200 | 0.66404500  |
| H | 5.18642700  | -4.49870100 | 0.47895100  |
| H | 5.87291100  | -3.09021600 | 1.30200100  |
| H | 4.11784400  | -3.29059000 | 1.21353300  |
| H | -4.17515800 | -3.97538400 | -0.00769900 |
| O | -0.94778400 | 1.64982300  | -2.23139000 |
| H | -1.23950200 | 1.51521000  | -3.14928800 |

52

RhB-3a\_open (charge=1 multiplicity=1 E= -1263.519283 Hartree)

|   |            |             |             |
|---|------------|-------------|-------------|
| C | 3.23805800 | -3.78472600 | 1.18961400  |
| C | 3.38195100 | -3.19241800 | -0.06154400 |
| C | 2.64950600 | -2.04833700 | -0.40625700 |



|   |             |             |             |
|---|-------------|-------------|-------------|
| C | 1.76657900  | -1.47971300 | 0.53770000  |
| C | 1.62701400  | -2.08861900 | 1.79266100  |
| C | 2.35415500  | -3.23355600 | 2.11767300  |
| H | 3.80977600  | -4.67286800 | 1.43739100  |
| H | 4.05866600  | -3.60491300 | -0.80161600 |
| H | 0.95409100  | -1.64751700 | 2.52133500  |
| H | 2.23239400  | -3.68724900 | 3.09607300  |
| C | 1.00955600  | -0.21725100 | 0.30450600  |
| C | 2.86182600  | -1.52902800 | -1.79246900 |
| O | 3.79796000  | -1.84094300 | -2.49521800 |
| C | 1.67281500  | 1.02976100  | 0.34214000  |
| C | 0.91566500  | 2.22251500  | 0.16012800  |
| C | 3.07277000  | 1.18776400  | 0.55277300  |
| C | 1.48726700  | 3.48065500  | 0.17173300  |
| C | 3.65871700  | 2.42419200  | 0.56566200  |
| H | 3.68002400  | 0.30345600  | 0.70672800  |
| C | 2.87545700  | 3.60507000  | 0.37173000  |
| H | 0.85643500  | 4.35043700  | 0.02725400  |
| H | 4.72769900  | 2.51985500  | 0.72752400  |
| C | -0.38125600 | -0.24505700 | 0.10914600  |
| C | -1.16554100 | -1.43370200 | 0.03788200  |
| C | -1.08984300 | 0.98059500  | -0.06200600 |
| C | -2.51599300 | -1.39615300 | -0.16384400 |
| H | -0.66724700 | -2.38968000 | 0.14852100  |
| C | -2.45162500 | 1.04308000  | -0.26377400 |
| C | -3.21963900 | -0.14899300 | -0.33038300 |
| H | -3.05642500 | -2.33105900 | -0.20157900 |
| H | -2.89480500 | 2.02254200  | -0.36729800 |
| O | -0.42945500 | 2.17060600  | -0.03169200 |
| N | 3.47101200  | 4.81912300  | 0.38721700  |
| N | -4.55661100 | -0.12224800 | -0.55834500 |
| C | -5.36413800 | -1.35606400 | -0.56675300 |
| H | -6.28044800 | -1.13069200 | -1.11607100 |
| H | -4.84384200 | -2.11830900 | -1.15375200 |
| C | -5.70727100 | -1.88114200 | 0.83096700  |
| H | -6.30989700 | -1.15829500 | 1.38618800  |
| H | -6.28057500 | -2.80914900 | 0.74854000  |
| H | -4.80509100 | -2.08690900 | 1.41366500  |
| C | -5.27950900 | 1.15527700  | -0.68571500 |
| H | -6.20513100 | 0.94631300  | -1.22594400 |
| H | -4.70046400 | 1.82444900  | -1.32937900 |
| C | -5.59475000 | 1.82496500  | 0.65609200  |
| H | -6.09243400 | 2.78386800  | 0.48437100  |
| H | -6.25883600 | 1.20198000  | 1.26012200  |

|   |             |             |             |
|---|-------------|-------------|-------------|
| H | -4.68553500 | 2.00949800  | 1.23455100  |
| H | 2.94124400  | 5.66578900  | 0.25581700  |
| H | 4.46385800  | 4.91122300  | 0.52989700  |
| O | 1.88428000  | -0.68844500 | -2.21219100 |
| H | 2.12283400  | -0.42532300 | -3.11758900 |

52

RhB-3b\_open (charge=1 multiplicity=1 E= -1263.519283 Hartree)

|   |             |             |             |
|---|-------------|-------------|-------------|
| C | 0.24270900  | 4.85858900  | -1.14520100 |
| C | 0.57344500  | 4.38772800  | 0.12214000  |
| C | 0.44980700  | 3.02869100  | 0.44071500  |
| C | 0.00266100  | 2.12242800  | -0.54530400 |
| C | -0.33141100 | 2.60996800  | -1.81656300 |
| C | -0.21558200 | 3.96725200  | -2.11573600 |
| H | 0.33923500  | 5.91495000  | -1.37285900 |
| H | 0.92826700  | 5.06096500  | 0.89458100  |
| H | -0.66739100 | 1.91278800  | -2.57775700 |
| H | -0.47717800 | 4.32265700  | -3.10729000 |
| C | -0.06926000 | 0.64836900  | -0.33769000 |
| C | 0.79761700  | 2.65140100  | 1.84529400  |
| O | 1.45496300  | 3.34615100  | 2.58888100  |
| C | 1.11033700  | -0.12289300 | -0.29910800 |
| C | 1.01233000  | -1.53801600 | -0.14222500 |
| C | 2.42546800  | 0.41467300  | -0.40397800 |
| C | 2.11704100  | -2.35896000 | -0.08118900 |
| C | 3.53753900  | -0.38105600 | -0.34264200 |
| H | 2.54074800  | 1.48426400  | -0.53563200 |
| C | 3.41205900  | -1.79909900 | -0.17561600 |
| H | 1.97417800  | -3.42742400 | 0.03817600  |
| H | 4.51970300  | 0.06630700  | -0.42555700 |
| C | -1.31572800 | 0.00022200  | -0.24174500 |
| C | -2.57208200 | 0.67276300  | -0.24674500 |
| C | -1.35383600 | -1.41997500 | -0.09548400 |
| C | -3.75484800 | -0.00752900 | -0.14041500 |
| H | -2.57916700 | 1.75282100  | -0.33489400 |
| C | -2.53205700 | -2.12531000 | 0.01175200  |
| C | -3.76625200 | -1.43531700 | -0.01175700 |
| H | -4.68905100 | 0.53922500  | -0.14721600 |
| H | -2.49351000 | -3.20389400 | 0.11845800  |
| O | -0.20300400 | -2.14439200 | -0.05059500 |
| N | 4.50072800  | -2.59369800 | -0.11351500 |
| N | -4.92556500 | -2.11736700 | 0.09179400  |
| C | -6.26802100 | -1.53350800 | 0.08988400  |
| H | -6.35261000 | -0.81422400 | 0.91433200  |
| H | -6.42352100 | -0.98184100 | -0.84592600 |

|   |             |             |             |
|---|-------------|-------------|-------------|
| C | -7.32010900 | -2.62764900 | 0.23737400  |
| H | -7.19330200 | -3.17165800 | 1.17878100  |
| H | -8.31941400 | -2.18684600 | 0.23647500  |
| H | -7.26662900 | -3.34096100 | -0.59133100 |
| H | 4.34793300  | -3.58630700 | -0.00279600 |
| H | -4.86891100 | -3.12220500 | 0.18157900  |
| C | 5.89308600  | -2.14965500 | -0.19970600 |
| H | 6.09448300  | -1.42787600 | 0.60186700  |
| H | 6.05232800  | -1.63384500 | -1.15518700 |
| C | 6.83586500  | -3.34256900 | -0.08203700 |
| H | 7.87302100  | -3.00624900 | -0.14621500 |
| H | 6.70687800  | -3.85384500 | 0.87728600  |
| H | 6.66509600  | -4.06161300 | -0.88969200 |
| O | 0.27794100  | 1.45987800  | 2.23011900  |
| H | 0.55881000  | 1.32589400  | 3.15151900  |

## References

1. Butkevich, A. N.; Bossi, M. L.; Lukinavičius, G.; Hell, S. W., *J Am Chem Soc* **2019**, *141* (2), 981-989.
2. Frisch, M. J.; Trucks, G. W.; Schlegel, H. B.; Scuseria, G. E.; Robb, M. A.; Cheeseman, J. R.; Scalmani, G.; Barone, V.; Mennucci, B.; Petersson, G. A.; Nakatsuji, H.; Caricato, M.; Li, X.; Hratchian, H. P.; Izmaylov, A. F.; Bloino, J.; Zheng, G.; Sonnenberg, J. L.; Hada, M.; Ehara, M.; Toyota, K.; Fukuda, R.; Hasegawa, J.; Ishida, M.; Nakajima, T.; Honda, Y.; Kitao, O.; Nakai, H.; Vreven, T.; Montgomery Jr., J. A.; Peralta, J. E.; Ogliaro, F.; M. Bearpark, Heyd, J. J.; Brothers, E. K.; Kudin, K. N.; Staroverov, V. N.; Kobayashi, R.; Normand, J.; Raghavachari, K.; Rendell, A.; Burant, J. C.; Iyengar, S. S.; Tomasi, J.; Cossi, M.; Rega, N.; Millam, J. M.; Klene, M.; Knox, J. E.; Cross, J. B.; Bakken, V.; Adamo, C.; Jaramillo, J.; Gomperts, R.; Stratmann, R. E.; Yazyev, O.; Austin, A. J.; Cammi, R.; Pomelli, C.; Ochterski, J. W.; Martin, R. L.; Morokuma, K.; Zakrzewski, V. G.; Voth, G. A.; Salvador, P.; Dannenberg, J. J.; Dapprich, S.; Daniels, A. D.; Farkas, Ö.; Foresman, J. B.; Ortiz, J. V.; Cioslowski, J.; and Fox, D. J. *Gaussian 16, Revision A03*; Gaussian, Inc., Wallingford, CT, **2016**.
3. Hohenberg, P.; Kohn, W., *Phys. Rev.* **1964**, *136*, B864–B871.
4. (a) Becke, A. D., *Phys. Rev. A* **1988**, *38*, 3098–3100. (b) Becke, A. D., *J. Chem. Phys.* **1993**, *98*, 5648–5652. (c) Lee, C.; Yang, W.; Parr, R. G., *Phys. Rev. B* **1988**, *37*, 785–789. (d) Stephens, P. J.; Devlin, F. J.; Chabalowski, C. F.; Frisch, M. J., *J. Phys. Chem.* **1994**, *98*, 11623–11627. (e) Hertwig, R. H.; Koch, W., *Chem. Phys. Lett.* **1997**, *268*, 345–351. (f) Grimme, S.; Antony, J.; Ehrlich, S.; Krieg, H. *J. Chem. Phys.* **2010**, *132*, 154104/1-20.
5. (a) Krishnan, R.; Binkley, J. S.; Seeger, R.; Pople, J. A., *J. Chem. Phys.* **1980**, *72*, 650–654. (b) Frisch, M. J.; Pople, J. A.; Binkley, J. S., *J. Chem. Phys.* **1984**, *80*, 3265-3269. (c) Lin, X.; Phillips, D. L. *J. Org. Chem.* **2008**, *73*, 3680–3688.
6. Perdew, J. P.; Burke, K.; Ernzerhof, M. *Phys. Rev. Lett.* **1996**, *18*, 3865–3868.

7. (a) Zhao, Y.; Chen, F. *J. Mult. Analy.* **2008**, *99*, 215–231. (b) Zhao, Y.; Truhlar, D. G. *J. Phys. Chem. C* **2008**, *112*, 6860–6868.
8. Marenich, A. V.; Cramer, C. J.; Truhlar, D. G., *J. Phys. Chem. B* **2009**, *113*, 6378–6396.
